# Supplementary material for: Timely double-strand break repair and pathway choice in pericentromeric heterochromatin depend on the histone demethylase dKDM4A
Source: PubMed Central journal article supplement — Genes Dev. 2019 Jan 1;33(1-2):103–15. doi: 10.1101/gad.317537.118 (PMC6317320; doi:10.1101/gad.317537.118), 2019-01-01
Supplement: supp_gad.317537.118_Supplemental_Fig_S1.pdf [file supp_gad.317537.118_Supplemental_Fig_S1.pdf]

## Supplemental figure 1

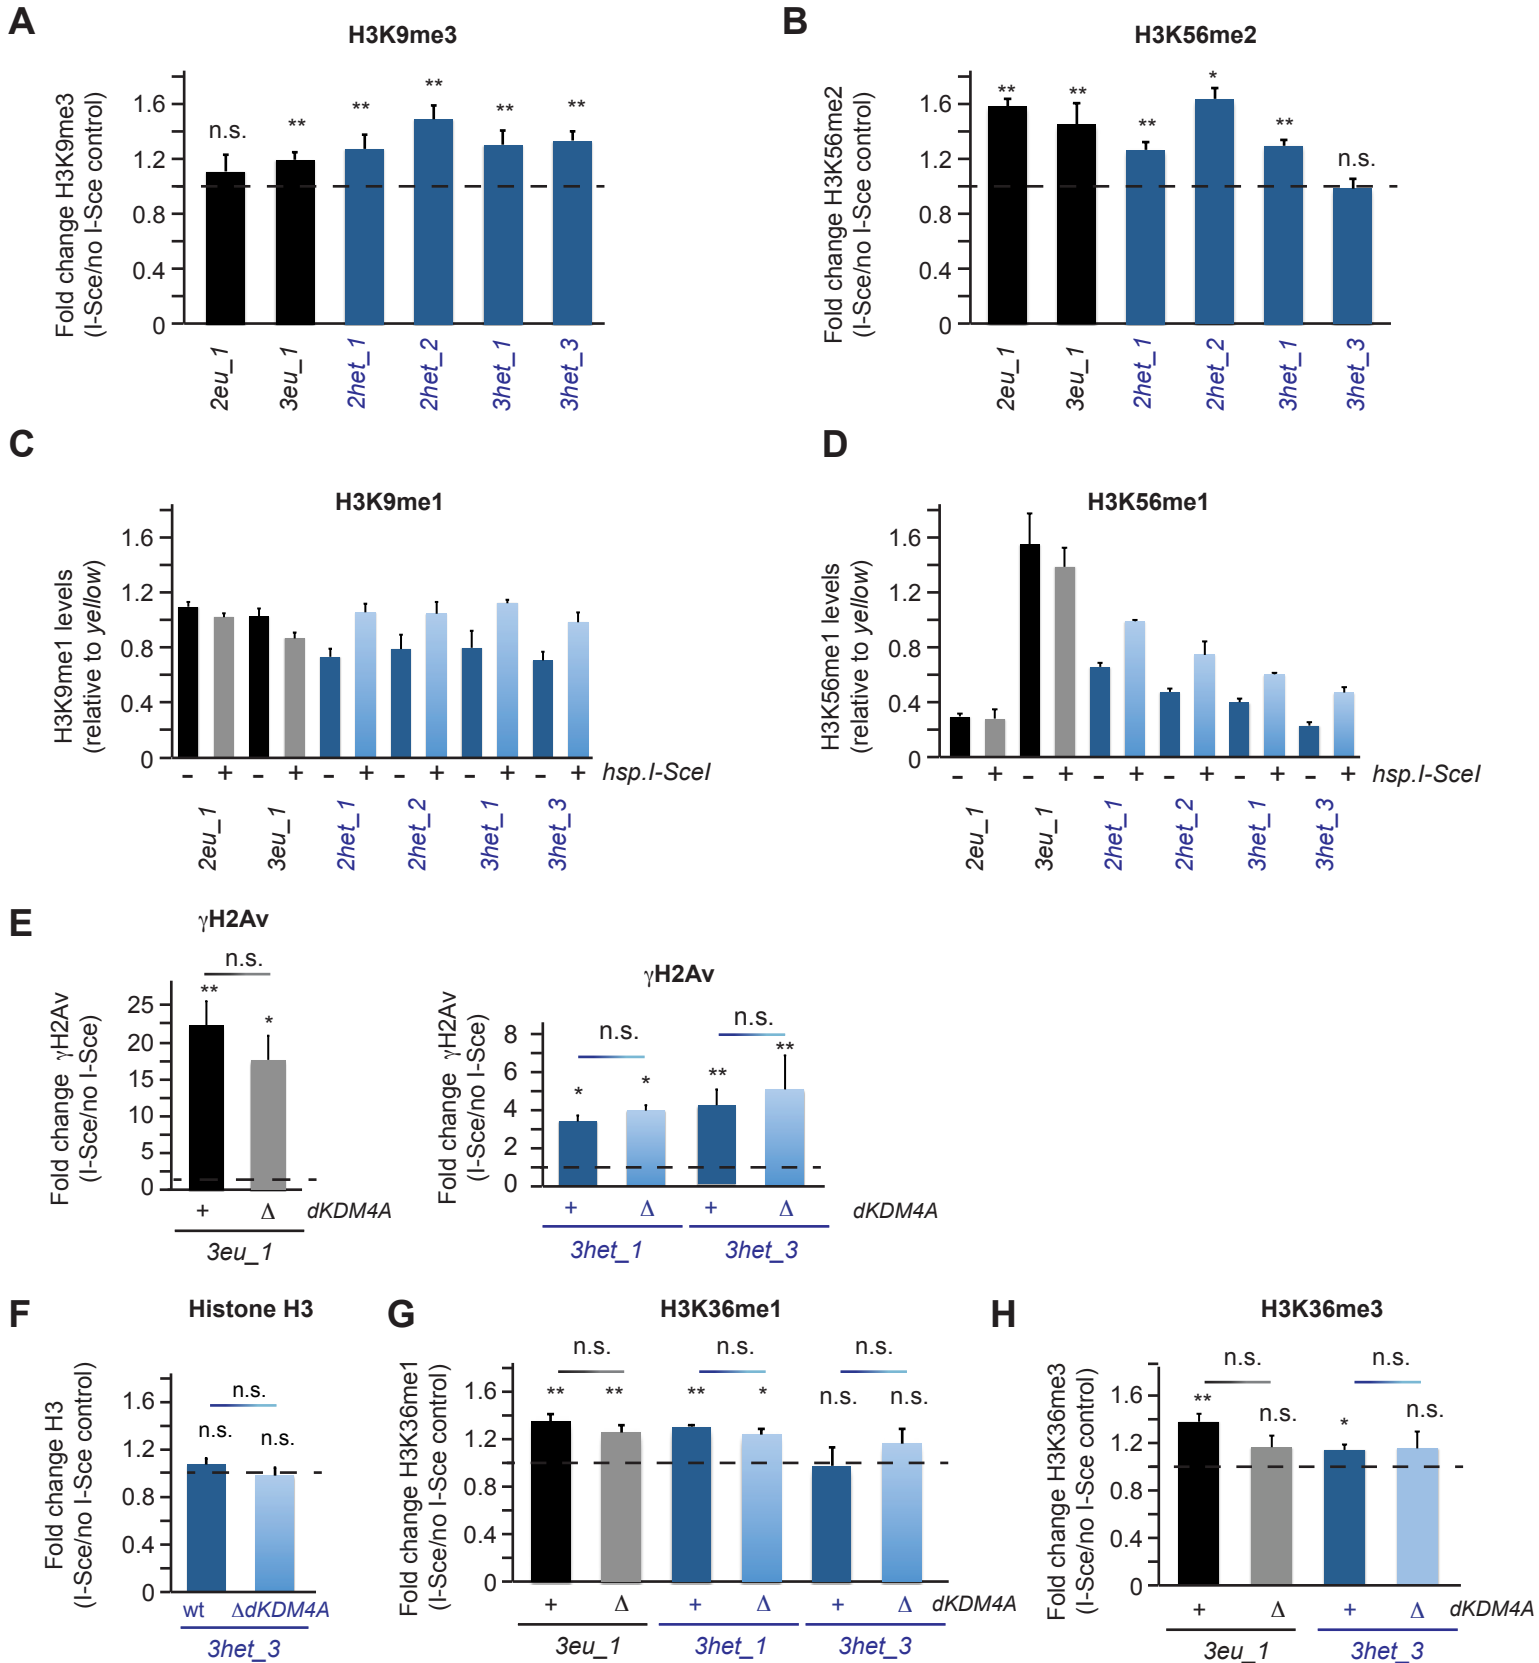

### Supplemental figure 1.

A-B, E-H) Chromatin was prepared from 3rd instar larvae with indicated DR-*white* genotypes, harvested 6-9 hours after heatshock with or without *hsp.I-SceI* expression, and subjected to ChIP-qPCR using indicated antibodies. Relative enrichment over input was calculated for each ChIP sample. Fold change is plotted for ChIP levels of *hsp.I-SceI* expressing larvae relative to ChIP levels of control heat shocked larvae (same genotype, but without I-SceI expression) as described in Fig. 1B. n.s. = p-value  $\geq$  0.05, \* = p-value < 0.05, \*\* = p-value < 0.01 (t-test, unpaired). Averages are shown for  $n \geq 3$  samples/condition + SEM. Dotted line indicates 'no change' in the level of the respective mark between samples with and without a DSB. C, D) Chromatin was prepared from 3rd instar larvae with indicated DR-*white* insertion sites and harvested 6-9 hours after heatshock with (+) or without (-) *hsp.I-SceI* expression and was subjected to ChIP-qPCR using H3K9me1 (C) or H3K56me1 (D) antibodies. The relative enrichment over *yellow* gene (internal positive control) is shown for one representative experiment.  $n = 3$  technical replicates + SD.
