# Supplementary material for: Timely double-strand break repair and pathway choice in pericentromeric heterochromatin depend on the histone demethylase dKDM4A
Source: PubMed Central journal article supplement — Genes Dev. 2019 Jan 1;33(1-2):103–15. doi: 10.1101/gad.317537.118 (PMC6317320; doi:10.1101/gad.317537.118), 2019-01-01
Supplement: supp_gad.317537.118_Supplemental_Fig_S2.pdf [file supp_gad.317537.118_Supplemental_Fig_S2.pdf]

## Supplemental figure 2

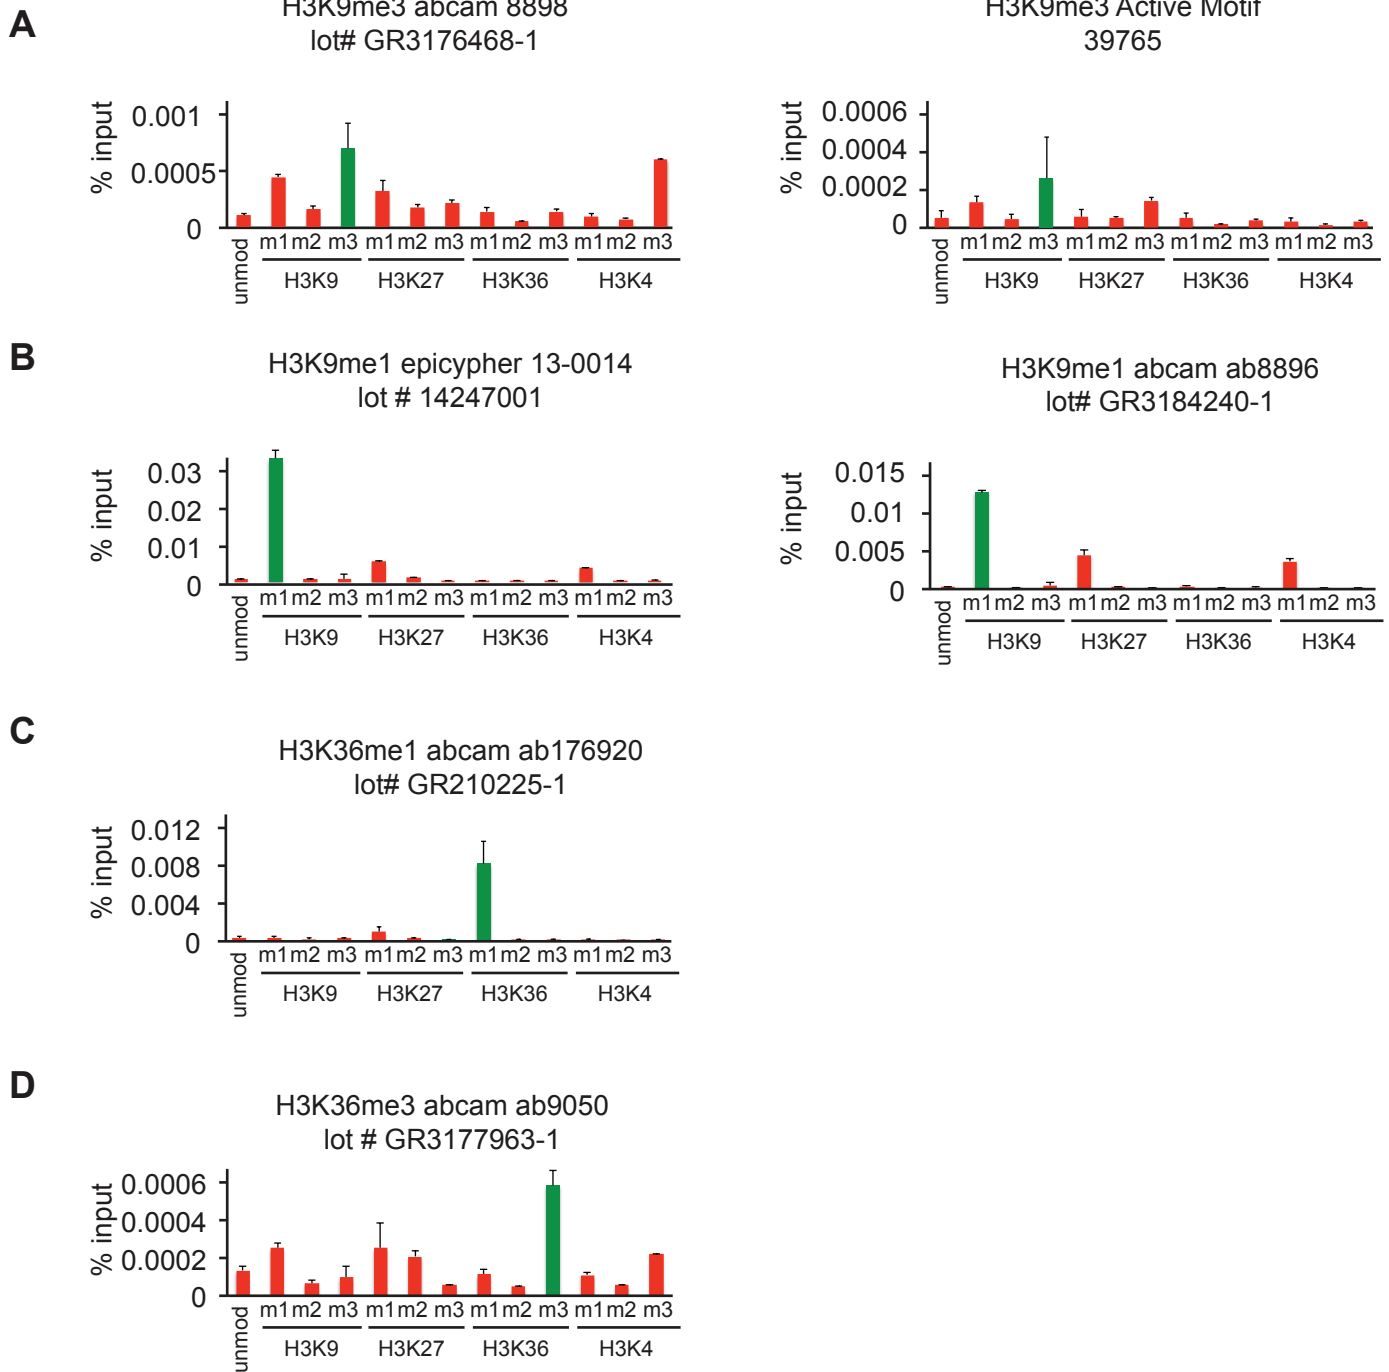

### Supplemental figure 2.

A-D) Chromatin immunoprecipitation efficiency and specificity was determined for antibodies using the Epicypher SNAP-ChIP K-MetStat panel spike-in. The relative enrichment over input is shown for nucleosomes containing unmethylated Histone H3 and Histone H3 mono, di- or tri-methylated on Lysine 4, 9, 27 or 36. Green bars indicate the relative enrichment of nucleosomes containing the expected target modification for the respective antibody. Red bars indicate the relative enrichment over input for off-target modifications.
