# Supplementary material for: Timely double-strand break repair and pathway choice in pericentromeric heterochromatin depend on the histone demethylase dKDM4A
Source: PubMed Central journal article supplement — Genes Dev. 2019 Jan 1;33(1-2):103–15. doi: 10.1101/gad.317537.118 (PMC6317320; doi:10.1101/gad.317537.118), 2019-01-01
Supplement: supp_gad.317537.118_Supplemental_Fig_S4.pdf [file supp_gad.317537.118_Supplemental_Fig_S4.pdf]

## Supplemental figure 4

A

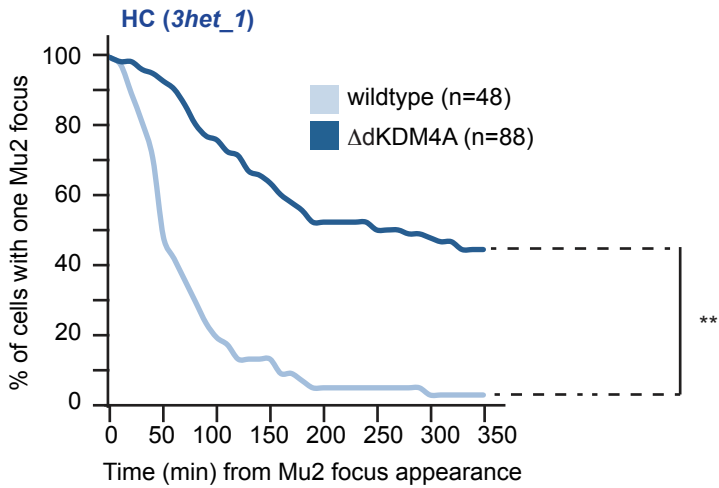

B

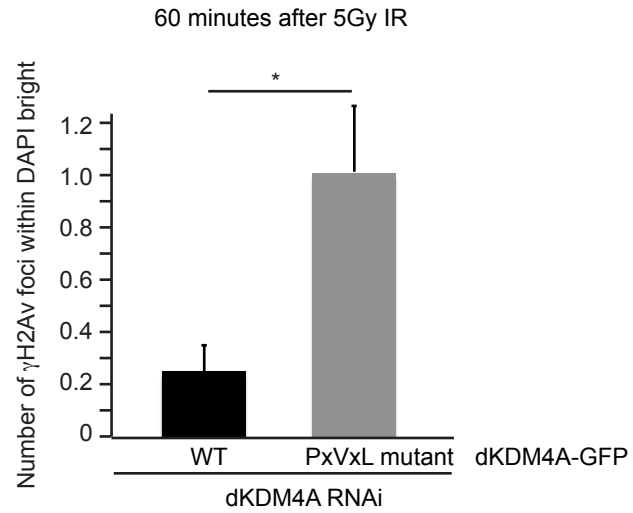

### Supplemental figure 4.

A) Time-lapse analysis (as in Fig. 2A) of single Mu2-YFP-foci disappearance (minutes from appearance) of the *3het\_1* heterochromatic DR-*white* insertion. Cells were imaged in wild type (light line) or  $\Delta$ dKDM4A homozygous mutant larval tissue ( $\Delta$ dKDM4A, dark line). n = number of cells with single Mu2 foci imaged for indicated conditions. \*\* = p-value < 0.0001, log-rank (Mantel-Cox) test. B) Quantification of the number of cells with  $\gamma$ H2Av foci in DAPI bright (heterochromatin) 60 minutes after irradiation upon dKDM4A depletion in the presence of RNAi-resistant wild type dKDM4A or the dKDM4A PxVxL mutant (V423A). Cells were fixed 60 minutes after irradiation and stained with an anti- $\gamma$ H2Av antibody and DAPI (DNA). Averages are shown + SEM. \* = p-value < 0.05 (t-test, unpaired).
